# Supplementary material
Source: HighWire-hosted journal article supplement (https://www.cfp.ca/highwire/filestream/37186/field_highwire_adjunct_files/1/Appendix_2_Ottawa_2015_Syrian_Refugee_Template_Children.pdf)
Supplement: Appendix_2_Ottawa_2015_Syrian_Refugee_Template_Children.pdf [file Appendix_2_Ottawa_2015_Syrian_Refugee_Template_Children.pdf]

**2015 Ottawa Syrian Refugee Template**  
**Initial Intake Assessment: School-Aged Child Version**

First Name: \_\_\_\_\_ Last Name: \_\_\_\_\_

Preferred Name: \_\_\_\_\_ Date: \_\_\_\_\_

☐ Female ☐ Male ☐ Other \_\_\_\_\_ Date of birth (YYYY/MM/DD) \_\_\_\_/\_\_\_\_/\_\_\_\_

Country of Origin: \_\_\_\_\_ Ethnicity: \_\_\_\_\_ Date of Arrival in Canada: \_\_\_\_\_

Countries migrated through: \_\_\_\_\_

Duration since first displaced internally \_\_\_\_\_ Duration since first displaced internationally \_\_\_\_\_

Ever lived in a refugee camp: ☐ Yes ☐ No

Languages Spoken: ☐ Eng ☐ Fr ☐ Arabic ☐ Kurdish ☐ Armenian ☐ Turkish ☐ Other

Status in Canada: ☐ GAR ☐ PSR ☐ BVOR ☐ Claimant ☐ New Immigrant ☐ Undocumented

Family Supports: \_\_\_\_\_ Settlement Worker/Agency: \_\_\_\_\_

**Vital Signs** Ht: for age \_\_\_\_% Wt: for age \_\_\_\_% HC: for age \_\_\_\_%  
 BP: HR: RR: O2 sat:

**Parent Identified Health Concerns:**

*Note: For symptomatic children see Caring for Kids New to Canada, Medical Problems: A Tool for Differential Diagnosis*  
<http://www.kidsnewtocanada.ca/signs-and-symptoms/signs-and-symptoms>

**Current Medical History:**

| Medical condition | Date of diagnosis | Comments |
|-------------------|-------------------|----------|
|                   |                   |          |
|                   |                   |          |
|                   |                   |          |

**Past Medical History:** (including surgical and mental health history)

**Hospitalizations:** ☐ Yes ☐ No Explain: \_\_\_\_\_

| Medical condition | Date of diagnosis | Comments |
|-------------------|-------------------|----------|
|                   |                   |          |
|                   |                   |          |
|                   |                   |          |

## Pregnancy & Birth Hx:

- gestational age? birthweight? complications at birth?

## Developmental History:

First walked at age: \_\_\_\_\_ First words at age: \_\_\_\_\_

Last schooling: (*setting, location, level attained*)

Previous concerns at home/school?

Behavioural issues:

- Able to sit still/follow instructions at home/at school?
- Redirection needed frequently?
- Signs of self-injury?
- Aggression towards others?

Sleep:

- Nocturesis/encopresis?
- Nightmares?

Appetite/Eating Habits:

Toileting:

*Note: Refer to "RED FLAGS" checklist if any concerns. Screening for trauma is not recommended, however care providers should be alert to age-specific symptoms of trauma such as disturbed sleep, separation anxiety, toileting problems and behavioural difficulties. Please refer to the attached mental health handout for where to seek additional resources and supports if concerns are identified..*

## Medications

| Name | Indication | Dose | Date started | Discontinued |
|------|------------|------|--------------|--------------|
|      |            |      |              |              |
|      |            |      |              |              |

Allergies:

\* No known drug allergies ☐ \*

## Immunizations:

☐ Complete records (see attached) ☐ Uncertain or absent records

*Note: If uncertain or absence patient requires full catch-up series. See Publically funded Ontario Immunization Schedules for age appropriate catch-up schedule. If >13 yrs test varicella serology prior to vaccinating. If <13 years vaccinate for varicella without serology testing.  
Other resources: <http://www.kidsnewtocanada.ca/screening/immunizations>*

**Family History:****Physical Exam:**

|                                                                                                                                         |                                                                                       |                                                                   |
|-----------------------------------------------------------------------------------------------------------------------------------------|---------------------------------------------------------------------------------------|-------------------------------------------------------------------|
| <b>General appearance:</b><br>Nutritional status<br>Dysmorphic facial features<br>Appropriate clothing<br>Speech fluency<br>Eye contact | <b>Head &amp; Neck:</b><br>Hearing<br>Visual acuity<br>Dental exam<br>Lymphadenopathy | <b>Skin:</b><br>Presence of Lice or Scabies<br>Scars/Skin Lesions |
| Chest & Abdo:<br>Wheezing<br>Work of Breathing<br>Murmur<br>Organomegaly                                                                | Neuro & MSK:<br>Reflexes<br>Limb movements symmetrical<br>Spine<br>Extremities        | Genitourinary exam:<br>Normal genitalia                           |

*Note: For dentists in Ottawa accepting refugee patients: <http://canadiandentistsforrefugees.net/patients/>*

**Screening Investigations:****All:**

- ☐ CBC + Diff
- ☐ Hep B Surface Antigen, Surface Antibody, Core Antibody
- ☐ Strongyloides stercoralis IgG
- ☐ G6PD

**Consider:**

- |                                                                                              |                                                                                  |
|----------------------------------------------------------------------------------------------|----------------------------------------------------------------------------------|
| <input type="checkbox"/> LFTs                                                                | <input type="checkbox"/> TSH/T4                                                  |
| <input type="checkbox"/> Hemoglobin electrophoresis                                          | <input type="checkbox"/> Fe/Ferritin                                             |
| <input type="checkbox"/> Serology for Varicella if $\geq 13$ yrs                             | <input type="checkbox"/> Vit D, Lead                                             |
| <input type="checkbox"/> Urinalysis                                                          | <input type="checkbox"/> Stool O+P x 2 (if chronic diarrhea or stunting/wasting) |
| <input type="checkbox"/> VDRL if $\geq 15$ or suspect sexual assault or congenital infection |                                                                                  |
| <input type="checkbox"/> HCV RNA if $> 16$ yrs                                               |                                                                                  |
| <input type="checkbox"/> Hep A IgG                                                           |                                                                                  |
| <input type="checkbox"/> BUN, Cr                                                             |                                                                                  |

*Note:*

*If serology indicates non immune for Varicella or Hep B please ensure they are vaccinated at a follow-up appointment and this is documented*

## Issues and Plan:

- ☐ Referral to community agency: \_\_\_\_\_
- ☐ How to access health system/clinic

*Note: For subsequent visits, refer to: <http://www.kidsnewtocanada.ca/e-checklist>*

Thank you for the future care of this patient. Should you have any questions feel free to contact the hub where this screening was done or physician experts using the e-consult service under the service category of “refugee and immigrant health”. To access e-consult in the Champlain LHIN please contact [econsultsupport@lhinworks.on.ca](mailto:econsultsupport@lhinworks.on.ca).

### Completed BY:

Name: \_\_\_\_\_ Phone # \_\_\_\_\_

Date: \_\_\_\_\_

### References & Resources:

**CCIRH e-checklist** [http://www.ccirhken.ca/ccirh/checklist\\_website/index.html](http://www.ccirhken.ca/ccirh/checklist_website/index.html)

**CMAJ 2015: Caring for a Syrian Family** <http://www.cmaj.ca/site/misc/caring-for-a-newly-arrived-syrian-refugee-family-cmaj.151422.xhtml>

**Caring for Kids New to Canada** <http://www.kidsnewtocanada.ca/>

**National Advisory Committee on Immunizations** <http://www.phac-aspc.gc.ca/naci-ccni/>

**Ontario Immunization Schedule** <http://www.health.gov.on.ca/en/pro/programs/immunization/schedule.aspx>

**Refugee613** <http://www.refugee613.ca/>

*Version 1.0 Dec 2015*

*Authors: Rebecca Warmington, Dolly Lin and Sarah Citron*

*Reviewers: C Geller, D Gruner, K Pottie, M Williams, J Bueckert, C Bradley, T Arnason, C Hui, E Macklin, TAudcent*
